# Supplementary material for: It Works! Organic-Waste-Assisted Trichoderma spp. Solid-State Fermentation on Agricultural Digestate
Source: MDPI journal article supplement (doi:10.3390/microorganisms10010164), 2022-01-13
Supplement: s1 [file s1]

Table S1 Biomass of *Trichoderma* spp. content in each dose of the root elongation assay expressed as gram of mycelium.

| Doses (%) | Mycelium (g)           |                           |                          |                          |
|-----------|------------------------|---------------------------|--------------------------|--------------------------|
|           | <i>T. asperellum</i> R | <i>T. atroviride</i> Ta13 | <i>T. harzianum</i> T-22 | <i>T. reesei</i> RUT-C30 |
| 100       | 8.90                   | 11.68                     | 3.49                     | 13.80                    |
| 30        | 2.67                   | 3.51                      | 1.05                     | 4.14                     |
| 15        | 1.33                   | 1.75                      | 0.52                     | 2.07                     |
| 7.5       | 0.67                   | 0.88                      | 0.26                     | 1.03                     |
| 3.75      | 0.33                   | 0.44                      | 0.13                     | 0.52                     |
| 1.8       | 0.17                   | 0.22                      | 0.07                     | 0.26                     |
